# Supplementary material for: Electrochemical properties of kenaf-based activated carbon monolith for supercapacitor electrode applications
Source: Royal Society of Chemistry journal article supplement (doi:10.1039/d1ra07815a), 2021-01-01
Supplement: d1ra07815a1.pdf [file d1ra07815a1.pdf]

## Electronic Supplementary Information (ESI)

### Electrochemical property of of kenaf-based activated carbon monolith for supercapacitor electrode applications

Han Yul Park,<sup>a</sup> Minhu Huang,<sup>b</sup> Kyung Hun Song<sup>\*a</sup> and Tae-Ho Yoon<sup>\*b</sup>

<sup>a</sup>Department of Clothing and Textiles, Pai Chai University, 155-40 Baejae-ro (Doma-Dong), Seo-Gu, Daejeon, 35345, South Korea

<sup>b</sup>School of Materials Science and Engineering, Gwangju Institute of Sci. and Tech. (GIST), 123 Cheomdangwagi-ro, Buk-gu, Gwangju, 61005, South Korea.

\* To whom correspondence should be addressed

- khsong@pcu.ac.kr, Tel: +82-42-520-5413, Fax: +82-70-4850-8468

- thyoon@gist.ac.kr, Tel: +82-62-715-2307, Fax: +82-62-715-2304

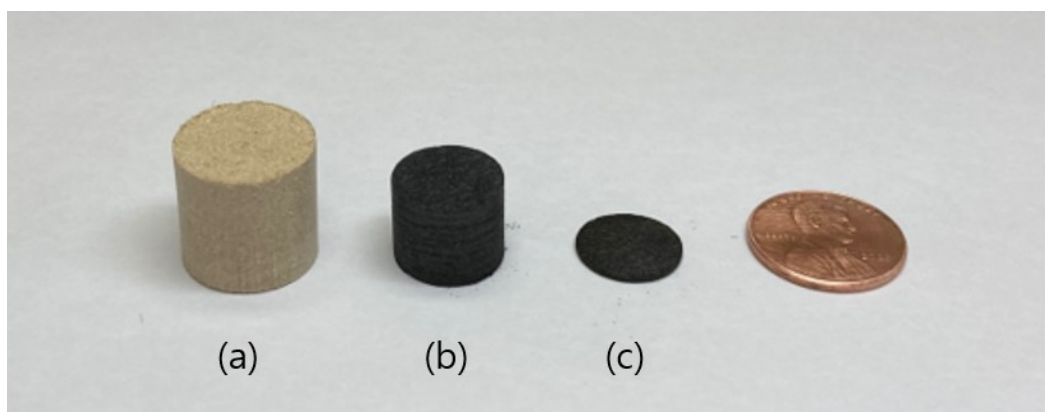

Fig. S1. Photographs of kenaf-based monolith (a), CMK after the pyrolysis at 500 °C for 4 h (b), and disc sample after the activation at 700 °C for 1 h (c).

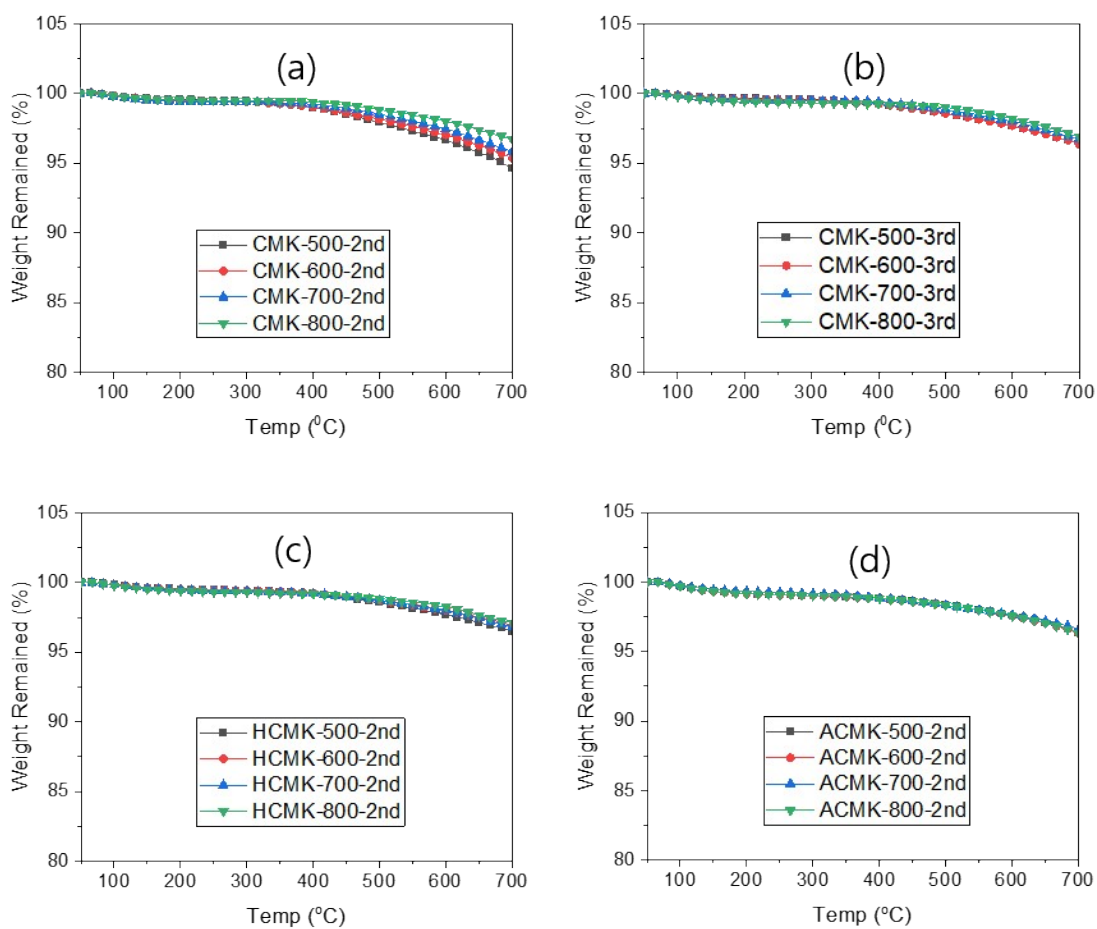

Fig. S2. The 2<sup>nd</sup> (a) and 3<sup>rd</sup> TGA (b) of CMK, as well as the 2<sup>nd</sup> TGA of HCMK (c) and ACMK (d) under N<sub>2</sub> flow of 20 cc/min at 10 °C/min.

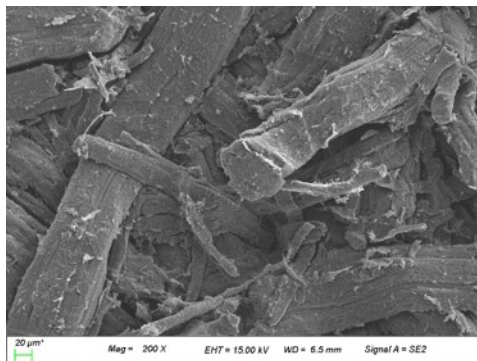

Fig. S3. SEM micrograph of as-molded kenaf fiber.

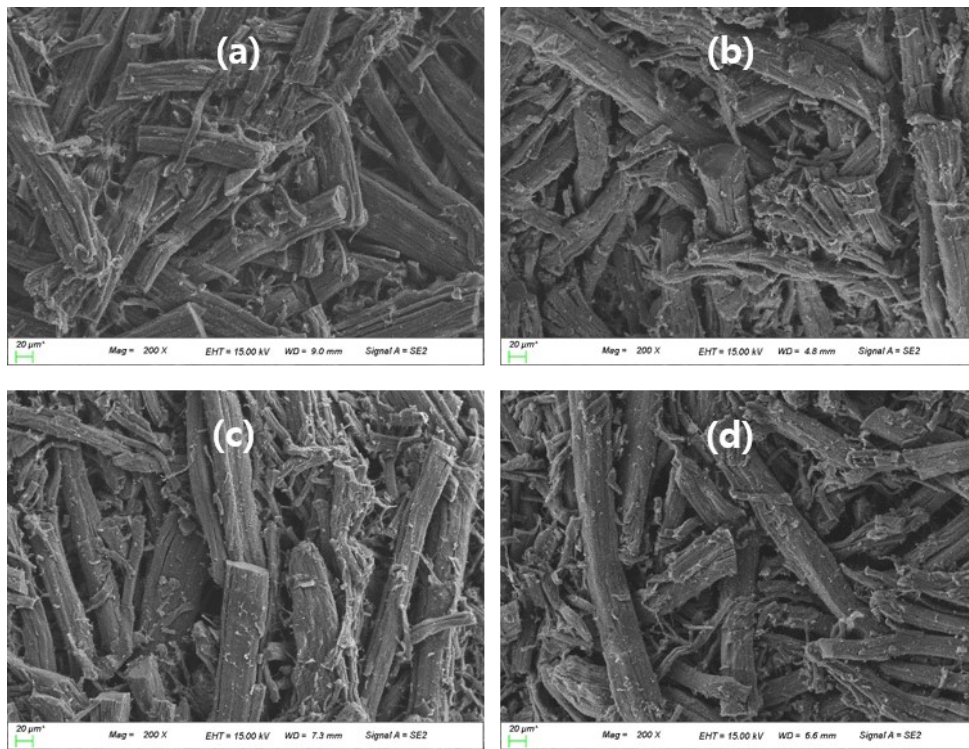

Fig. S4. SEM micrograph of CMK-500 (a), CMK-600 (b), CMK-700 (c) and CMK-800 (d).

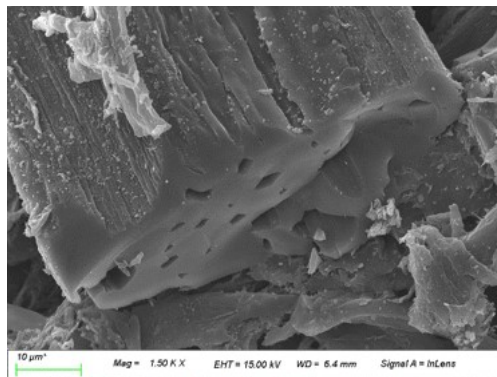

Fig. S5. SEM micrograph of kenaf fiber from CMK-500.

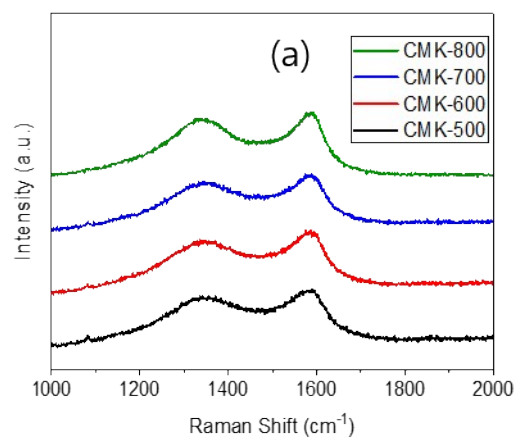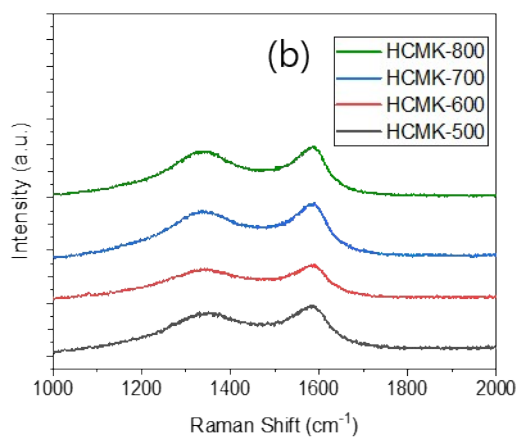

Fig. S6. Raman spectroscopy of CMK (a) and HCMK (b).

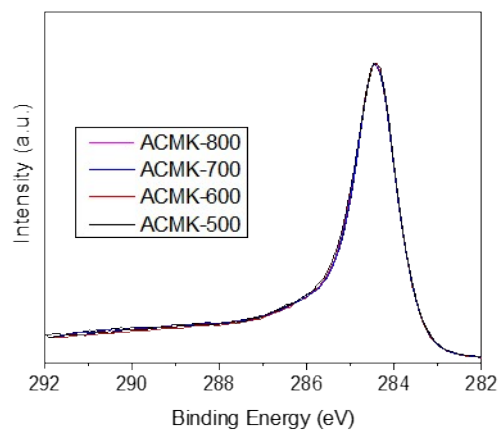

Fig. S7.  $C_{1s}$  peaks from ACMKs.



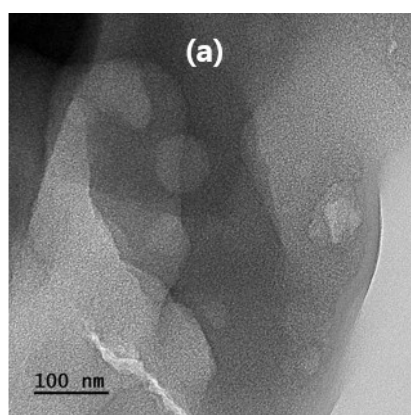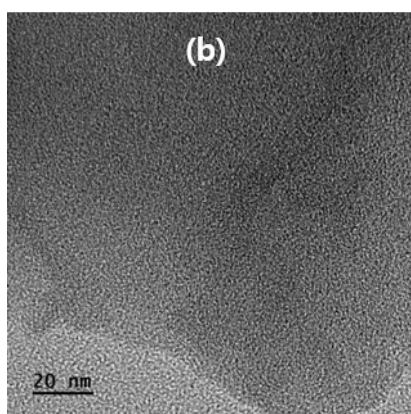

Fig. S8. TEM micrographs of ACMK-500 at low (a) and high (b) magnification

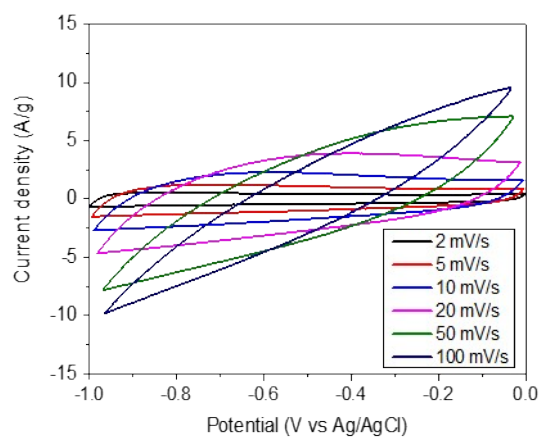

Fig. S9. Scan rate variation of CV curve from ACMK-500 via a 3-electrode system.

Table S1. Weight changes of CMKs upon the pyrolysis, KOH solution soaking, activation as well as heat treatment along with diameter loss upon the pyrolysis.

|         | Wt. loss (%)<br>by pyrolysis | Diam. loss (%) by<br>pyrolysis | Wt. gain (%)<br>via KOH soaking | Wt. loss (%)<br>via activation | Wt. loss (%)<br>via heat treatment |
|---------|------------------------------|--------------------------------|---------------------------------|--------------------------------|------------------------------------|
| CMK-500 | 74.7                         | 17.5                           | 55.1                            | 18.7                           | 13.3                               |
| CMK-600 | 77.3                         | 20.5                           | 53.7                            | 13.9                           | 7.7                                |
| CMK-700 | 79.5                         | 22.9                           | 54.3                            | 9.3                            | 4.9                                |
| CMK-800 | 80.7                         | 23.2                           | 53.5                            | 7.8                            | 3.5                                |
